# Supplementary material for: Patterns of intravenous fluid resuscitation use in adult intensive care patients between 2007 and 2014: An international cross-sectional study
Source: PubMed Central journal article supplement (PMC5428917; doi:10.1371/journal.pone.0176292), 2017-05-12
Supplement: pone.0176292.s002.pdf [file pone.0176292.s002.pdf]

**S1 Table. Crystalloid and colloid fluid types collected**

| <b>Crystalloid groups</b>                       | <b>Fluid type</b>                                                                                                                                                                                                                              |
|-------------------------------------------------|------------------------------------------------------------------------------------------------------------------------------------------------------------------------------------------------------------------------------------------------|
| <b>0.9% sodium chloride</b>                     | 'normal saline' / 'saline'                                                                                                                                                                                                                     |
| <b>Buffered (balanced) salt solutions (BSS)</b> | Hartmann's, Plasmalyte R®, Plasmalyte 148®, Plasmalyte A®, lactated Ringer's, Ringer's acetate, Ringer's simple®                                                                                                                               |
| <b>Other Crystalloids</b>                       | Hypertonic saline (>0.9% e.g. 3%, 7%, 7.5%, 20%);<br>Glucose or glucose/saline (e.g. 5% glucose, 5% glucose in water, 4%N/5, 3.75%N/4, 2.5%N/2, Plasmalyte M®);<br>Hypertonic glucose (e.g. >5% eg 10%, 20%, 50% dextrose); Sodium Bicarbonate |
| <b>Colloid groups</b>                           | <b>Fluid type</b>                                                                                                                                                                                                                              |
| <b>Albumin</b>                                  | 4% (or 5%), 20% (or 25%)                                                                                                                                                                                                                       |
| <b>Hydroxyethyl starch</b>                      | 6% Hydroxyethyl starch (130/0.4x) in saline, 6% Hydroxyethyl starch (130/0.4x) in buffered salt solutions;<br>Other hydroxyethyl starch preparations                                                                                           |
| <b>Gelatins</b>                                 | Gelofusin®, Haemaccel®                                                                                                                                                                                                                         |
| <b>Dextran</b>                                  | Dextran 40 or 70 (incl. macrodex®, rheomacrodex®)                                                                                                                                                                                              |
