# Supplementary material for: Patterns of intravenous fluid resuscitation use in adult intensive care patients between 2007 and 2014: An international cross-sectional study
Source: PubMed Central journal article supplement (PMC5428917; doi:10.1371/journal.pone.0176292), 2017-05-12
Supplement: pone.0176292.s003.pdf [file pone.0176292.s003.pdf]

**S2 Table. Fluid indication hierarchy used in analysis**

|                                                           |                                                                                                                                                                                                                                                                                                                                                                                                                                                                                                                                                                                                                                                                                                                                                                                                              |
|-----------------------------------------------------------|--------------------------------------------------------------------------------------------------------------------------------------------------------------------------------------------------------------------------------------------------------------------------------------------------------------------------------------------------------------------------------------------------------------------------------------------------------------------------------------------------------------------------------------------------------------------------------------------------------------------------------------------------------------------------------------------------------------------------------------------------------------------------------------------------------------|
| <p><b>1. Impaired perfusion OR low cardiac output</b></p> | <p><b>YES to any of:</b><br/>           Low urine output (3.08)<br/>           Low measured cardiac output (3.09-3.11)<br/>           Low SvO2/ScvO2 (3.13)<br/>           Clinical signs of poor peripheral perfusion (3.12)<br/>           Increasing or persisting acidosis or lactate (3.17)<br/>           Positive Straight Leg Raise test (3.18)<br/>           Abnormal indices of Pulse Pressure Variation (3.19)</p>                                                                                                                                                                                                                                                                                                                                                                               |
| <p><b>2. Ongoing bleeding</b></p>                         | <p><b>NO to all of:</b><br/>           Low urine output (3.08)<br/>           Low measured cardiac output (3.09-3.11)<br/>           Low ScO2/ScvO2 (3.13)<br/>           Clinical signs of poor peripheral perfusion (3.12)<br/>           Increasing or persisting acidosis or lactate (3.17)<br/>           Positive Straight Leg Raise test (3.18)<br/>           Abnormal indices of Pulse Pressure Variation (3.19)<br/> <b>YES to:</b><br/>           Ongoing bleeding (3.14)<br/>           Other = Anemia<br/>           Other = Coagulopathy</p>                                                                                                                                                                                                                                                   |
| <p><b>3. Other (non-hemorrhagic) fluid losses</b></p>     | <p><b>NO to all of:</b><br/>           Low urine output (3.08)<br/>           Low measured cardiac output (3.09-3.11)<br/>           Low ScO2/ScvO2 (3.13)<br/>           Clinical signs of poor peripheral perfusion (3.12)<br/>           Increasing or persisting acidosis or lactate (3.17)<br/>           Positive Straight Leg Raise test (3.18)<br/>           Abnormal indices of Pulse Pressure Variation (3.19)<br/>           Ongoing bleeding (3.14)<br/>           Other = Anemia<br/>           Other = Coagulopathy<br/> <b>YES to:</b><br/>           Other ongoing fluid loss (3.15)</p>                                                                                                                                                                                                    |
| <p><b>4. Unit protocol</b></p>                            | <p><b>NO to all of:</b><br/>           Low urine output (3.08)<br/>           Low measured cardiac output (3.09-3.11)<br/>           Low ScO2/ScvO2 (3.13)<br/>           Clinical signs of poor peripheral perfusion (3.12)<br/>           Increasing or persisting acidosis or lactate (3.17)<br/>           Positive Straight Leg Raise test (3.18)<br/>           Abnormal indices of Pulse Pressure Variation (3.19)<br/>           Ongoing bleeding (3.14)<br/>           Other ongoing fluid loss (3.15)<br/>           Other = Anemia<br/>           Other = Coagulopathy<br/> <b>YES to any of:</b><br/>           Unit protocol or standing orders (3.16)</p>                                                                                                                                      |
| <p><b>5. Abnormal vital signs only</b></p>                | <p><b>NO to all of:</b><br/>           Low urine output (3.08)<br/>           Low measured cardiac output (3.09-3.11)<br/>           Low ScO2/ScvO2 (3.13)<br/>           Ongoing bleeding (3.14)<br/>           Other ongoing fluid loss (3.15)<br/>           Unit protocol or standing orders (3.16)<br/>           Clinical signs of poor peripheral perfusion (3.12)<br/>           Increasing or persisting acidosis or lactate (3.17)<br/>           Positive Straight Leg Raise test (3.18)<br/>           Abnormal indices of Pulse Pressure Variation (3.19)<br/> <b>YES to any of:</b><br/>           Hypotension (3.03)<br/>           Increasing inotrope or vasopressor requirements (3.04)<br/>           Low CVP (3.05)<br/>           Low PCWP (3.06)<br/>           Tachycardia (3.07)</p> |
| <p><b>6. Other</b></p>                                    | <p><b>NO to:</b><br/>           3.03 – 3.19<br/> <b>YES to:</b><br/>           Other (3.20) unless it falls into one of the other specified categories</p>                                                                                                                                                                                                                                                                                                                                                                                                                                                                                                                                                                                                                                                   |

Table S2: Number next to the fluid indication relates to the case report form data number.
