# Supplementary material for: Patterns of intravenous fluid resuscitation use in adult intensive care patients between 2007 and 2014: An international cross-sectional study
Source: PubMed Central journal article supplement (PMC5428917; doi:10.1371/journal.pone.0176292), 2017-05-12
Supplement: pone.0176292.s004.pdf [file pone.0176292.s004.pdf]

**S3 Table. Characteristics of 1,456 fluid patients in relation to administration of crystalloid or colloid**

| Variable                                                                  | N    | Crystalloid |               |         | Colloid       |             |         |
|---------------------------------------------------------------------------|------|-------------|---------------|---------|---------------|-------------|---------|
|                                                                           |      | Yes         | No            | P Value | Yes           | No          | P Value |
| <b>Patient Characteristics</b>                                            |      |             |               |         |               |             |         |
| Age, year, median(IQR)]                                                   | 1456 | 64(50,74)   | 65(55,76)     | 0.023   | 64(53,74)     | 64(50,75)   | 0.461   |
| Male, %(N)                                                                | 878  | 59.2(726)   | 66.4(152)     | 0.041   | 65(256)       | 58.6(622)   | 0.027   |
| <b>Number of days in the ICU (N=1455)</b>                                 |      |             |               |         |               |             |         |
| Number of days in ICU median(IQR)]                                        | 1455 | 1(0,6)      | 3(1,10)       | <0.001  | 2(0,7)        | 1(0,6)      | 0.091   |
| Number of days in ICU at survey date =0 day, %(N)                         | 446  | 33.5(411)   | 15.4(35)      | <0.001  | 28.5(112)     | 31.5(334)   | 0.278   |
| Number of days in ICU at survey date >0 day, %(N)                         | 1009 | 66.5(816)   | 84.6(193)     |         | 71.5(281)     | 68.5(728)   |         |
| <b>Severity of illness scores in 24 hrs prior to survey date (N=1456)</b> |      |             |               |         |               |             |         |
| APACHE II [median(IQR)]                                                   | 628  | 18(12,25)   | 21(15,26)     | 0.003   | 18(12,24)     | 18(12,25)   | 0.638   |
| SAPS II [median(IQR)]                                                     | 233  | 44(31.2,57) | 49(43.5,68.5) | 0.177   | 48.5(34.8,69) | 44(31,56.5) | 0.143   |
| SAPS III [median(IQR)]                                                    | 233  | 52(37,66.5) | 65(48.2,72)   | 0.244   | 59(48,71)     | 51(37,66)   | 0.085   |
| Severity of illness , Low(< median), %(N)                                 | 556  | 39.4(484)   | 31.4(72)      | 0.006   | 37.1(146)     | 38.6(410)   | 0.011   |
| Severity of illness , High(>= median), %(N)                               | 593  | 39(478)     | 50.2(115)     |         | 46.2(182)     | 38.7(411)   |         |
| Severity of illness , Missing, %(N)                                       | 307  | 21.6(265)   | 18.3(42)      |         | 16.8(66)      | 22.7(241)   |         |
| <b>Trauma (N=1453)</b>                                                    |      |             |               |         |               |             |         |
| Trauma at hospital admission, Yes, %(N)                                   | 142  | 10.6(130)   | 5.3(12)       | 0.013   | 6.6(26)       | 10.9(116)   | 0.014   |
| Traumatic brain injury, Yes, %(N)                                         | 37   | 2.9(35)     | 0.9(2)        | 0.083   | 1(4)          | 3.1(33)     | 0.025   |
| <b>Sepsis in 24 hrs prior to survey date (N=1453)</b>                     |      |             |               |         |               |             |         |
| Sepsis, Yes, %(N)                                                         | 550  | 36(441)     | 47.8(109)     | <0.001  | 43(169)       | 35.9(381)   | 0.014   |
| <b>APACHE II chronic health points (CHP) criteria (N=1447), %(N)</b>      |      |             |               |         |               |             |         |
| CHP liver criteria, Yes                                                   | 56   | 3.3(40)     | 7.1(16)       | 0.007   | 6.2(24)       | 3.1(32)     | 0.007   |
| CHP renal criteria, Yes                                                   | 33   | 2.3(28)     | 2.2(5)        | 0.936   | 1.8(7)        | 2.5(26)     | 0.439   |
| CHP cardiac criteria, Yes                                                 | 88   | 5.8(70)     | 8(18)         | 0.202   | 8.2(32)       | 5.4(56)     | 0.045   |
| CHP respiratory criteria, Yes                                             | 92   | 5.5(67)     | 11(25)        | 0.002   | 7.6(30)       | 5.9(62)     | 0.235   |
| CHP immunocompromised, Yes                                                | 157  | 11(134)     | 10.2(23)      | 0.703   | 11.8(46)      | 10.6(111)   | 0.522   |
| <b>Admission Source (N=1455), %(N)</b>                                    |      |             |               |         |               |             |         |
| Operating room after elective surgery                                     | 380  | 26.8(329)   | 22.3(51)      | <0.001  | 27.4(108)     | 25.6(272)   | 0.003   |
| Emergency room                                                            | 330  | 24.1(295)   | 15.3(35)      |         | 16.2(64)      | 25.1(266)   |         |
| Hospital floor                                                            | 252  | 16.7(205)   | 20.5(47)      |         | 19(75)        | 16.7(177)   |         |
| Transferred from other ICU or hospital                                    | 166  | 10.6(130)   | 15.7(36)      |         | 13.7(54)      | 10.6(112)   |         |
| Operating room after emergency surgery                                    | 204  | 14.4(176)   | 12.2(28)      |         | 12.7(50)      | 14.5(154)   |         |
| Hospital floor after previous ICU stay                                    | 123  | 7.4(91)     | 14(32)        |         | 10.9(43)      | 7.5(80)     |         |

Summary statistics of continuous variables are presented as median (IQR) with p values of non-parametric test (i.e. Wilcoxon rank-sum test). Summary statistics of categorical variables are presented in proportions with p values of chi<sup>2</sup> test. Categorical variables with ≥ 20% missing values are analysed with missing as separate groups.
