# Supplementary material for: Patterns of intravenous fluid resuscitation use in adult intensive care patients between 2007 and 2014: An international cross-sectional study
Source: PubMed Central journal article supplement (PMC5428917; doi:10.1371/journal.pone.0176292), 2017-05-12
Supplement: pone.0176292.s005.pdf [file pone.0176292.s005.pdf]

**S4 Table. Indication for fluid and fluid prescriber for 2716 fluid resuscitation episodes**

| Variable                                                | % (N)<br>(N = 2697) | Variable                             | % (N)<br>(N = 2716) |
|---------------------------------------------------------|---------------------|--------------------------------------|---------------------|
| <b>Indication for fluid in each fluid resuscitation</b> |                     | <b>Fluid prescriber</b>              |                     |
| <b>Impaired perfusion OR low cardiac output</b>         | 61.4 (1655)         | Specialist<br>(consultant/attending) | 48.6 (1321)         |
| <b>Ongoing bleeding</b>                                 | 2.3 (63)            | Registrar (mid-level)                | 29.4 (798)          |
| <b>Other fluid losses</b>                               | 4 (108)             | Resident (junior)                    | 18.3 (497)          |
| <b>Unit protocol</b>                                    | 5 (134)             | Nurse and other                      | 3.7 (100)           |
| <b>Abnormal vital signs</b>                             | 25.7 (693)          |                                      |                     |
| <b>Fluid indication, other</b>                          | 1.6 (44)            |                                      |                     |
