# Supplementary material for: Patterns of intravenous fluid resuscitation use in adult intensive care patients between 2007 and 2014: An international cross-sectional study
Source: PubMed Central journal article supplement (PMC5428917; doi:10.1371/journal.pone.0176292), 2017-05-12
Supplement: pone.0176292.s006.pdf [file pone.0176292.s006.pdf]

**S5 Table. Univariate analysis of factors associated with administration of crystalloid or colloid for 2716 fluid resuscitation episodes in 1456 patients**

| Variable                                                  | OR[95%CI] for receiving crystalloid | p_value | OR[95%CI] for receiving colloid | p_value |
|-----------------------------------------------------------|-------------------------------------|---------|---------------------------------|---------|
| Age (per one year increase)                               | 0.99[0.98 to 1]                     | 0.0070  | 1.01[1 to 1.01]                 | 0.0710  |
| <b>Gender</b>                                             |                                     |         |                                 |         |
| Female                                                    | 1.00                                |         | 1.00                            |         |
| Male                                                      | 1.34[1.04 to 1.73]                  | 0.0247  | 0.73[0.58 to 0.93]              | 0.0103  |
| Number of days in ICU at survey date                      | 0.99[0.99 to 1]                     | 0.0724  | 1.01[1 to 1.01]                 | 0.1032  |
| <b>Number of days in ICU at survey</b>                    |                                     |         |                                 |         |
| 0 day                                                     | 1.00                                |         | 1.00                            |         |
| >0 day                                                    | 0.56[0.42 to 0.73]                  | <0.0001 | 1.54[1.2 to 1.98]               | 0.0007  |
| <b>Severity of illness in 24 hrs prior to survey date</b> |                                     |         |                                 |         |
| Low(< median)                                             | 1.00                                | 0.0068  | 1.00                            | 0.0052  |
| High(>= median)                                           | 0.67[0.51 to 0.88]                  |         | 1.39[1.08 to 1.8]               |         |
| Missing                                                   | 0.99[0.7 to 1.4]                    |         | 0.88[0.63 to 1.23]              |         |
| <b>Trauma at hospital admission Yes/No</b>                |                                     |         |                                 |         |
| Trauma at hospital admission, No                          | 1.00                                |         | 1.00                            |         |
| Trauma at hospital admission, Yes                         | 1.85[1.14 to 3.01]                  | 0.0125  | 0.55[0.35 to 0.85]              | 0.0079  |
| <b>Traumatic brain injury Yes/No</b>                      |                                     |         |                                 |         |
| Traumatic brain injury, No                                | 1.00                                |         | 1.00                            |         |
| Traumatic brain injury, Yes                               | 3.37[0.97 to 11.67]                 | 0.0556  | 0.29[0.1 to 0.87]               | 0.0277  |
| <b>Trauma category at hospital admission</b>              |                                     |         |                                 |         |
| No trauma                                                 | 1.00                                | 0.0362  | 1.00                            | 0.0186  |
| Trauma without TBI                                        | 1.58[0.94 to 2.67]                  |         | 0.65[0.4 to 1.05]               |         |
| Trauma with TBI                                           | 3.47[1 to 12.02]                    |         | 0.28[0.1 to 0.85]               |         |
| <b>Sepsis in 24 hrs prior to survey date</b>              |                                     |         |                                 |         |
| Sepsis in 24 hrs prior to survey date, No                 | 1.00                                |         | 1.00                            |         |
| Sepsis in 24 hrs prior to survey date, Yes                | 0.66[0.52 to 0.85]                  | 0.0010  | 1.47[1.16 to 1.85]              | 0.0014  |
| <b>Chronic health points liver criteria</b>               |                                     |         |                                 |         |
| No                                                        | 1.00                                |         | 1.00                            |         |
| Yes                                                       | 0.44[0.26 to 0.74]                  | 0.0023  | 2.04[1.21 to 3.42]              | 0.0073  |
| <b>Chronic health points renal criteria</b>               |                                     |         |                                 |         |
| No                                                        | 1.00                                |         | 1.00                            |         |
| Yes                                                       | 1.06[0.46 to 2.47]                  | 0.8901  | 0.77[0.33 to 1.8]               | 0.5514  |
| <b>Chronic health points cardiac criteria</b>             |                                     |         |                                 |         |
| No                                                        | 1.00                                |         | 1.00                            |         |
| Yes                                                       | 0.58[0.37 to 0.9]                   | 0.0163  | 1.63[1.06 to 2.53]              | 0.0274  |
| <b>Chronic health points respiratory criteria</b>         |                                     |         |                                 |         |
| No                                                        | 1.00                                |         | 1.00                            |         |
| Yes                                                       | 0.61[0.39 to 0.96]                  | 0.0314  | 1.36[0.87 to 2.14]              | 0.1814  |
| <b>Chronic health points immunocompromised</b>            |                                     |         |                                 |         |
| No                                                        | 1.00                                |         | 1.00                            |         |
| Yes                                                       | 1.01[0.68 to 1.48]                  | 0.9782  | 1.05[0.73 to 1.51]              | 0.7827  |

|                                               |                    |         |                    |         |
|-----------------------------------------------|--------------------|---------|--------------------|---------|
| <b>Admission source</b>                       |                    |         |                    |         |
| <b>Operating room after elective surgery</b>  | 1.00               | 0.0014  | 1.00               | 0.0033  |
| <b>Emergency room</b>                         | 0.55[0.37 to 0.83] |         | 1.59[1.09 to 2.33] |         |
| <b>Hospital floor</b>                         | 0.46[0.29 to 0.72] |         | 2.05[1.34 to 3.13] |         |
| <b>Transferred from other ICU or hospital</b> | 0.8[0.51 to 1.26]  |         | 1.25[0.82 to 1.9]  |         |
| <b>Operating room after emergency surgery</b> | 0.75[0.51 to 1.1]  |         | 1.34[0.94 to 1.91] |         |
| <b>Hospital floor after previous ICU stay</b> | 0.45[0.27 to 0.73] |         | 2.16[1.36 to 3.42] |         |
| <b>Indication for fluid</b>                   |                    |         |                    |         |
| <b>Impaired perfusion/low cardiac output</b>  | 1.00               | <0.0001 | 1.00               | <0.0001 |
| <b>Ongoing bleeding</b>                       | 0.67[0.31 to 1.46] |         | 1.57[0.82 to 3]    |         |
| <b>Other fluid losses</b>                     | 0.68[0.4 to 1.13]  |         | 1.66[1.04 to 2.65] |         |
| <b>Unit protocol</b>                          | 0.22[0.12 to 0.41] |         | 4.11[2.3 to 7.33]  |         |
| <b>Abnormal vital signs</b>                   | 0.74[0.58 to 0.95] |         | 1.22[0.96 to 1.54] |         |
| <b>Fluid indication, other</b>                | 0.23[0.09 to 0.56] |         | 3.76[1.6 to 8.84]  |         |
| <b>Fluid prescriber</b>                       |                    |         |                    |         |
| <b>Specialist</b>                             | 1.00               | 0.0002  | 1.00               | <0.0001 |
| <b>Registrar</b>                              | 0.58[0.45 to 0.74] |         | 1.84[1.45 to 2.32] |         |
| <b>Resident</b>                               | 1.01[0.72 to 1.43] |         | 1.04[0.76 to 1.42] |         |
| <b>Nurse</b>                                  | 2.8[0.15 to 52.37] |         | 0.36[0.03 to 4.42] |         |
| <b>Fluid prescriber, other</b>                | 0.91[0.38 to 2.18] |         | 1.22[0.57 to 2.62] |         |
| <b>Cardiac failure</b>                        |                    |         |                    |         |
| <b>No (cardiac SOFA&lt;3)</b>                 | 1.00               |         | 1.00               |         |
| <b>Yes (cardiac SOFA&gt;=3)</b>               | 0.84[0.67 to 1.05] | 0.1167  | 1.21[0.98 to 1.5]  | 0.0779  |
| <b>Respiratory failure</b>                    |                    |         |                    |         |
| <b>No (respiratory SOFA&lt;3)</b>             | 1.00               |         | 1.00               |         |
| <b>Yes (respiratory SOFA&gt;=3)</b>           | 0.79[0.61 to 1.03] | 0.0832  | 1.43[1.12 to 1.83] | 0.0043  |
| <b>Renal replacement therapy</b>              |                    |         |                    |         |
| <b>No</b>                                     | 1.00               |         | 1.00               |         |
| <b>Yes</b>                                    | 0.54[0.38 to 0.76] | 0.0005  | 1.92[1.37 to 2.67] | 0.0001  |
| <b>Mechanical ventilation</b>                 |                    |         |                    |         |
| <b>No</b>                                     | 1.00               |         | 1.00               |         |
| <b>Yes</b>                                    | 0.61[0.49 to 0.77] | <0.0001 | 1.61[1.29 to 2.01] | <0.0001 |
| <b>Low filling pressure</b>                   |                    |         |                    |         |
| <b>No,</b>                                    | 1.00               | <0.0001 | 1.00               | <0.0001 |
| <b>Yes</b>                                    | 1.8[0.86 to 3.74]  |         | 0.89[0.48 to 1.64] |         |
| <b>Missing</b>                                | 1.73[1.36 to 2.19] |         | 0.55[0.44 to 0.69] |         |
| <b>Metabolic acidosis</b>                     |                    |         |                    |         |
| <b>No</b>                                     | 1.00               | 0.1767  | 1.00               | 0.3005  |
| <b>Yes</b>                                    | 1.22[0.97 to 1.54] |         | 0.85[0.68 to 1.05] |         |
| <b>Missing</b>                                | 1[0.8 to 1.26]     |         | 0.97[0.79 to 1.21] |         |
| <b>Lactate(mmol/L)</b>                        |                    |         |                    |         |
| <b>&lt;2,</b>                                 | 1.00               | 0.1406  | 1.00               | 0.8615  |
| <b>&gt;=2</b>                                 | 1.22[0.97 to 1.54] |         | 0.94[0.76 to 1.17] |         |
| <b>missing</b>                                | 0.98[0.79 to 1.22] |         | 0.99[0.8 to 1.22]  |         |

|                                                      |                    |         |                    |         |
|------------------------------------------------------|--------------------|---------|--------------------|---------|
| <b>Heart rate, b/min</b>                             | 1[1 to 1.01]       | 0.1725  | 1[1 to 1]          | 0.9384  |
| <b>Heart rate (per 10 b/min increase)</b>            | 1.03[0.99 to 1.08] | 0.1657  | 1[0.96 to 1.04]    | 0.9740  |
| <b>Mean arterial pressure</b>                        | 1[0.99 to 1]       | 0.3293  | 1[1 to 1.01]       | 0.5181  |
| <b>Mean arterial pressure (per 10 mmHg decrease)</b> | 1.03[0.98 to 1.09] | 0.1999  | 0.97[0.93 to 1.02] | 0.2864  |
| <b>Creatinine(umol/L)</b>                            |                    |         |                    |         |
| <b>&lt;170</b>                                       | 1.00               | 0.6113  | 1.00               | 0.7008  |
| <b>&gt;=170</b>                                      | 0.99[0.73 to 1.33] |         | 1.04[0.78 to 1.39] |         |
| <b>missing</b>                                       | 0.9[0.72 to 1.11]  |         | 1.1[0.89 to 1.36]  |         |
| <b>Bilirubin(umol/L)</b>                             |                    |         |                    |         |
| <b>&lt;20</b>                                        | 1.00               | 0.0038  | 1.00               | 0.0020  |
| <b>&gt;=20</b>                                       | 1.08[0.82 to 1.43] |         | 1[0.76 to 1.3]     |         |
| <b>missing</b>                                       | 1.47[1.16 to 1.85] |         | 0.69[0.54 to 0.87] |         |
| <b>Albumin(g/L)</b>                                  |                    |         |                    |         |
| <b>&lt;27</b>                                        | 1.00               | <0.0001 | 1.00               | <0.0001 |
| <b>&gt;=27</b>                                       | 0.76[0.56 to 1.03] |         | 1.28[0.96 to 1.71] |         |
| <b>missing</b>                                       | 1.59[1.18 to 2.15] |         | 0.61[0.46 to 0.8]  |         |
| <b>Urine output(ml/kg/hr)</b>                        |                    |         |                    |         |
| <b>&lt;0.5</b>                                       | 1.00               | 0.1275  | 1.00               | 0.3264  |
| <b>&gt;=0.5</b>                                      | 0.95[0.74 to 1.23] |         | 1.1[0.87 to 1.4]   |         |
| <b>missing</b>                                       | 1.22[0.91 to 1.66] |         | 0.94[0.71 to 1.24] |         |
| <b>Fluid output(ml/kg/hr)</b>                        |                    |         |                    |         |
| <b>&lt;1</b>                                         | 1.00               | 0.0032  | 1.00               | 0.0054  |
| <b>&gt;=1</b>                                        | 1.08[0.82 to 1.43] |         | 1.02[0.78 to 1.32] |         |
| <b>missing</b>                                       | 1.63[1.16 to 2.3]  |         | 0.7[0.51 to 0.97]  |         |

Continuous variables with  $\geq 20\%$  missing values are dichotomised and analysed with missing as a separate groups. Categorical variables with  $\geq 20\%$  missing values are also analysed with missing as a separate groups. Results are generated from generalised estimating equation (GEE) models with patient ID assigned as clusters. Variables with p-values from GEE  $<0.1$  were eligible to be included in multivariate analysis.
