# Supplementary material for: Patterns of intravenous fluid resuscitation use in adult intensive care patients between 2007 and 2014: An international cross-sectional study
Source: PubMed Central journal article supplement (PMC5428917; doi:10.1371/journal.pone.0176292), 2017-05-12
Supplement: pone.0176292.s007.pdf [file pone.0176292.s007.pdf]

**S6 Table. Multivariate analysis of factors associated with the use of crystalloid and colloid for fluid resuscitation episodes in 2014**

| Characteristic                                            | OR (95%CI) for receiving crystalloid | p_value | OR (95%CI) for receiving colloid | p_value |
|-----------------------------------------------------------|--------------------------------------|---------|----------------------------------|---------|
| <b>Study region</b>                                       |                                      | <0.001  |                                  | <0.001  |
| France                                                    | 1.00                                 |         | 1.00                             |         |
| Australia                                                 | 0.16 (0.07 to 0.34)                  |         | 4.16 (2.05 to 8.42)              |         |
| Brazil                                                    | 6.69 (3.19 to 14.07)                 |         | 0.19 (0.1 to 0.36)               |         |
| Canada                                                    | 0.41 (0.18 to 0.95)                  |         | 1.75 (0.79 to 3.88)              |         |
| China                                                     | 0.20 (0.09 to 0.41)                  |         | 6.96 (3.49 to 13.88)             |         |
| Denmark                                                   | 0.68 (0.25 to 1.88)                  |         | 1.02 (0.37 to 2.8)               |         |
| Germany                                                   | 3.36 (1.37 to 8.23)                  |         | 0.33 (0.15 to 0.71)              |         |
| New Zealand                                               | 0.31 (0.11 to 0.9)                   |         | 2.28 (0.84 to 6.18)              |         |
| Saudi Arabia                                              | 0.57 (0.19 to 1.68)                  |         | 1.87 (0.68 to 5.12)              |         |
| UK                                                        | 1.46 (0.49 to 4.38)                  |         | 0.44 (0.15 to 1.28)              |         |
| Other European countries                                  | 0.28 (0.12 to 0.64)                  |         | 2.63 (1.21 to 5.70)              |         |
| Other countries                                           | 0.61 (0.28 to 1.37)                  |         | 1.46 (0.7 to 3.06)               |         |
| Age (per one year increase)                               | 0.99 (0.98 to 1)                     | 0.026   | 1.01 (1 to 1.02)                 | 0.156   |
| Gender                                                    |                                      | 0.108   |                                  | 0.063   |
| Female                                                    | 1.00                                 |         | 1.00                             |         |
| Male                                                      | 0.77 (0.56 to 1.06)                  |         | 1.33 (0.98 to 1.79)              |         |
| <b>Number of days in ICU at survey date</b>               |                                      | <0.001  |                                  | <0.001  |
| Number of days in ICU at survey date =0 day               | 1.00                                 |         | 1.00                             |         |
| Number of days in ICU at survey date >0 day               | 0.46 (0.32 to 0.66)                  |         | 1.75 (1.27 to 2.41)              |         |
| <b>Severity of illness in 24 hrs prior to survey date</b> |                                      |         |                                  |         |
| Low(< median)                                             | 1.00                                 | 0.259   | 1.00                             | 0.097   |
| High(>= median)                                           | 0.93 (0.65 to 1.33)                  |         | 1.05 (0.75 to 1.47)              |         |
| Missing                                                   | 1.37 (0.84 to 2.24)                  |         | 0.66 (0.42 to 1.03)              |         |
| <b>Trauma at hospital admission</b>                       |                                      |         |                                  |         |
| No Trauma                                                 | 1.00                                 | 0.086   | 1.00                             | 0.006   |
| Trauma without TBI                                        | 1.25 (0.68 to 2.28)                  |         | 0.64 (0.35 to 1.15)              |         |
| Trauma with TBI                                           | 3.29 (1.11 to 9.74)                  |         | 0.24 (0.1 to 0.62)               |         |
| <b>Sepsis in 24 hrs prior to survey date</b>              |                                      |         |                                  |         |
| No                                                        | 1.00                                 |         | 1.00                             |         |
| Yes                                                       | 0.82 (0.59 to 1.14)                  | 0.2412  | 1.12 (0.81 to 1.54)              | 0.489   |
| <b>Chronic health point liver criteria</b>                |                                      |         |                                  |         |
| No                                                        | 1.00                                 |         | 1.00                             |         |
| Yes                                                       | 0.40 (0.19 to 0.8)                   | 0.010   | 1.99 (1.05 to 3.75)              | 0.035   |
| <b>Chronic health point cardiac criteria</b>              |                                      |         |                                  |         |
| No                                                        | 1.00                                 |         | 1.00                             |         |
| Yes                                                       | 0.75 (0.42 to 1.34)                  | 0.335   | 1.26 (0.74 to 2.16)              | 0.392   |
| <b>Chronic health point respiratory criteria</b>          |                                      |         |                                  |         |
| No                                                        | 1.00                                 |         | 1.00                             |         |
| Yes                                                       | 1.07 (0.61 to 1.89)                  | 0.815   | 0.74 (0.42 to 1.32)              | 0.307   |

|                                                 |                      |       |                     |       |
|-------------------------------------------------|----------------------|-------|---------------------|-------|
| <b>Admission source</b>                         |                      |       |                     |       |
| <b>Operating room after elective surgery</b>    | 1.00                 | 0.072 | 1.00                | 0.023 |
| <b>Emergency room</b>                           | 1.58 (0.93 to 2.67)  |       | 0.68 (0.42 to 1.08) |       |
| <b>Hospital floor</b>                           | 1.06 (0.64 to 1.76)  |       | 0.82 (0.51 to 1.32) |       |
| <b>Transferred from other ICU or hospital</b>   | 0.83 (0.5 to 1.39)   |       | 1.17 (0.72 to 1.9)  |       |
| <b>Operating room after emergency surgery</b>   | 1.10 (0.65 to 1.84)  |       | 0.94 (0.57 to 1.52) |       |
| <b>Hospital floor after previous ICU stay</b>   | 0.61 (0.32 to 1.16)  |       | 1.78 (1 to 3.15)    |       |
| <b>Indication for fluid</b>                     |                      |       |                     |       |
| <b>Impaired perfusion or low cardiac output</b> | 1.00                 | 0.070 | 1.00                | 0.382 |
| <b>Ongoing bleeding</b>                         | 0.53 (0.18 to 1.55)  |       | 1.33 (0.49 to 3.6)  |       |
| <b>Other fluid losses</b>                       | 1.11 (0.58 to 2.12)  |       | 0.91 (0.49 to 1.7)  |       |
| <b>Unit protocol</b>                            | 0.40 (0.2 to 0.8)    |       | 1.97 (1 to 3.88)    |       |
| <b>Abnormal vital signs</b>                     | 0.88 (0.64 to 1.22)  |       | 1.00 (0.74 to 1.34) |       |
| <b>Indication for fluid, other</b>              | 0.36 (0.1 to 1.32)   |       | 1.88 (0.51 to 6.94) |       |
| <b>Fluid prescriber</b>                         |                      |       |                     |       |
| <b>Specialist</b>                               | 1.00                 | 0.485 | 1.00                | 0.393 |
| <b>Registrar</b>                                | 1.09 (0.76 to 1.57)  |       | 0.94 (0.67 to 1.32) |       |
| <b>Resident</b>                                 | 1.25 (0.79 to 1.97)  |       | 0.83 (0.55 to 1.26) |       |
| <b>Nurse</b>                                    | 4.38 (0.56 to 34.25) |       | 0.23 (0.03 to 1.71) |       |
| <b>Fluid prescriber, other</b>                  | 0.90 (0.3 to 2.68)   |       | 1.37 (0.53 to 3.52) |       |
| <b>Cardiovascular dysfunction</b>               |                      |       |                     |       |
| <b>No (SOFA&lt;3)</b>                           | 1.00                 |       | 1.00                |       |
| <b>Yes (SOFA&gt;=3)</b>                         | 1.07 (0.78 to 1.46)  | 0.672 | 0.99 (0.74 to 1.33) | 0.960 |
| <b>Respiratory dysfunction</b>                  |                      |       |                     |       |
| <b>No (SOFA&lt;3)</b>                           | 1.00                 |       | 1.00                |       |
| <b>Yes (SOFA&gt;=3)</b>                         | 1.32 (0.96 to 1.81)  | 0.093 | 0.92 (0.68 to 1.24) | 0.572 |
| <b>Renal replacement therapy</b>                |                      |       |                     |       |
| <b>No</b>                                       | 1.00                 |       | 1.00                |       |
| <b>Yes</b>                                      | 0.59 (0.37 to 0.93)  | 0.022 | 1.77 (1.13 to 2.77) | 0.013 |
| <b>Mechanical ventilation</b>                   |                      |       |                     |       |
| <b>No</b>                                       | 1.00                 |       | 1.00                |       |
| <b>Yes</b>                                      | 0.65 (0.47 to 0.91)  | 0.012 | 1.36 (0.98 to 1.87) | 0.063 |
| <b>Low filling pressure</b>                     |                      |       |                     |       |
| <b>No</b>                                       | 1.00                 | 0.173 | 1.00                | 0.260 |
| <b>Yes</b>                                      | 2.50 (0.74 to 8.43)  |       | 0.97 (0.39 to 2.4)  |       |
| <b>missing</b>                                  | 1.24 (0.89 to 1.72)  |       | 0.77 (0.55 to 1.05) |       |
| <b>Bilirubin</b>                                |                      |       |                     |       |
| <b>&lt;20 umol/L</b>                            | 1.00                 | 0.142 | 1.00                | 0.057 |
| <b>&gt;=20 umol/L</b>                           | 0.69 (0.47 to 1)     |       | 1.56 (1.08 to 2.23) |       |
| <b>missing</b>                                  | 0.89 (0.59 to 1.35)  |       | 1.12 (0.76 to 1.66) |       |
| <b>Albumin</b>                                  |                      |       |                     |       |
| <b>&lt;27 g/L</b>                               | 1.00                 | 0.997 | 1.00                | 0.783 |
| <b>&gt;=27 g/L</b>                              | 1.01 (0.69 to 1.49)  |       | 0.89 (0.61 to 1.29) |       |
| <b>missing</b>                                  | 1.00 (0.62 to 1.61)  |       | 0.87 (0.55 to 1.37) |       |

|                        |                     |       |                     |       |
|------------------------|---------------------|-------|---------------------|-------|
| <b>Fluid output</b>    |                     |       |                     |       |
| <b>&lt;1 ml/kg/hr</b>  | 1.00                | 0.973 | 1.00                | 0.737 |
| <b>&gt;=1 ml/kg/hr</b> | 0.97 (0.67 to 1.4)  |       | 1.14 (0.81 to 1.61) |       |
| <b>missing</b>         | 0.95 (0.61 to 1.48) |       | 1.15 (0.76 to 1.74) |       |

Results are generated from a generalised estimating equation model with patient ID as a cluster. The P-values displayed in the table are type III P-values. Analysis include 2,463 episodes and 1,317 study participants as data were lost due to missing values which could not be included in the multivariate analysis. This number represents a loss of 9.3% of episodes and 9.5% of study participants.
