# Supplementary material for: Patterns of intravenous fluid resuscitation use in adult intensive care patients between 2007 and 2014: An international cross-sectional study
Source: PubMed Central journal article supplement (PMC5428917; doi:10.1371/journal.pone.0176292), 2017-05-12
Supplement: pone.0176292.s008.pdf [file pone.0176292.s008.pdf]

**S7 Table. Comparison of patient characteristics of 527 fluid patients in 2007 and 491 fluid patients in 2014**

| Variable                                                   | 2007 |                    | 2014 |                    | p value |
|------------------------------------------------------------|------|--------------------|------|--------------------|---------|
|                                                            | N    | Summary statistics | N    | Summary statistics |         |
| <b>Demographic characteristics</b>                         |      |                    |      |                    |         |
| Age, year [median(IQR)]                                    | 527  | 66.0(52,75)        | 491  | 63.0(53,74)        | 0.147   |
| Male, %(N)                                                 | 527  | 67.2(354)          | 491  | 62.5(307)          | 0.121   |
| Number of days in ICU                                      | 527  |                    | 491  |                    |         |
| Number of days in ICU [median(IQR)]                        |      | 3.0(0,10)          |      | 1.0(0,7)           | <.001   |
| Admission source (%N)                                      | 526  |                    | 491  |                    |         |
| Operating room after elective surgery                      |      | 27.6(145)          |      | 24.2(119)          | 0.154   |
| Emergency room                                             |      | 16.2(85)           |      | 21.8(107)          |         |
| Hospital floor                                             |      | 21.7(114)          |      | 18.3(90)           |         |
| Transferred from other ICU or hospital                     |      | 11.0(58)           |      | 13.2(65)           |         |
| Operating room after emergency surgery                     |      | 14.8(78)           |      | 13.6(67)           |         |
| Hospital floor after previous ICU stay                     |      | 8.7(46)            |      | 8.8(43)            |         |
| Surgical diagnosis on admission, Yes %(N)                  | 527  | 47.6(251)          | 491  | 44.0(216)          | 0.245   |
| Trauma                                                     | 526  |                    | 490  |                    |         |
| Trauma at hospital admission, Yes %(N)                     |      | 10.5(55)           |      | 9.2(45)            | 0.496   |
| Traumatic brain injury, Yes %(N)                           |      | 3.2(17)            |      | 2.0(10)            | 0.238   |
| Sepsis in the 24 hrs prior to survey data                  | 525  |                    | 491  |                    |         |
| Sepsis, Yes %(N)                                           |      | 30.5(160)          |      | 35.8(176)          | 0.069   |
| ARDS in the 24 hrs prior to survey data                    | 525  |                    | 491  |                    |         |
| ARDS, Yes %(N)                                             |      | 6.5(34)            |      | 7.7(38)            | 0.433   |
| Severity of illness score in 24 hrs prior to survey date** | 521  |                    | 396  |                    |         |
| APACHE II [median(IQR)]**                                  |      | 15.0(10,21)        | 269  | 18.0(12,24)        | 0.069   |
| SAPS II [median(IQR)]**                                    | N/A  |                    | 88   | 42.0(28,52)        |         |
| SAPS III [median(IQR)]**                                   | N/A  |                    | 9    | 52.0(47,57)        |         |
| Severity of illness score, OTHER type **                   | N/A  |                    | 30   | 6.1(30)            |         |
| Severity of illness, High(>= median)**                     |      | 48.6(253)          | 396  | 56.3(223)          | 0.295   |
| APACHE II chronic health points (CHP) criteria, %(N)       | 523  |                    | 490  |                    |         |
| CHP liver criteria                                         |      | 5.5(29)            | 486  | 6.0(29)            | 0.774   |
| CHP renal criteria                                         |      | 4.0(21)            | 487  | 2.5(12)            | 0.166   |
| CHP cardiac criteria                                       |      | 8.4(44)            | 487  | 8.4(41)            | 0.997   |
| CHP respiratory criteria                                   |      | 7.1(37)            | 488  | 6.1(30)            | 0.554   |
| CHP immunocompromised                                      |      | 8.6(45)            | 487  | 6.8(33)            | 0.277   |

Summary statistics of continuous variables are presented as median (IQR) with p values of non-parametric test (i.e. Wilcoxon rank-sum test). Summary statistics of categorical variables are presented in proportions with p values of chi<sup>2</sup> test. \*\*Variables have >10% missing values. N/A= not applicable as data wasn't collected.
