# Supplementary material for: Patterns of intravenous fluid resuscitation use in adult intensive care patients between 2007 and 2014: An international cross-sectional study
Source: PubMed Central journal article supplement (PMC5428917; doi:10.1371/journal.pone.0176292), 2017-05-12
Supplement: pone.0176292.s009.pdf [file pone.0176292.s009.pdf]

**S8 Table. Comparison of indication for fluid and fluid prescriber between 1167 fluid resuscitation episodes in 2007 and 960 fluid resuscitation episodes in 2014**

| Variable                                                       | 2007 |                    | 2014 |                    | p value |
|----------------------------------------------------------------|------|--------------------|------|--------------------|---------|
|                                                                | N    | Summary statistics | N    | Summary statistics |         |
| <b>Indication for fluid in each fluid resuscitation, % (N)</b> | 1152 |                    | 955  |                    |         |
| <b>Impaired perfusion/low cardiac output</b>                   |      | 41.7 (480)         |      | 55.1 (526)         | <0.001  |
| <b>Ongoing bleeding</b>                                        |      | 5.7 (66)           |      | 2.9 (28)           |         |
| <b>Other fluid losses</b>                                      |      | 2.8 (32)           |      | 6.9 (66)           |         |
| <b>Unit protocol</b>                                           |      | 11.3 (130)         |      | 8.5 (81)           |         |
| <b>Abnormal vital signs</b>                                    |      | 35.6 (410)         |      | 23.8 (227)         |         |
| <b>Other</b>                                                   |      | 3.0 (34)           |      | 2.8 (27)           |         |
| <b>Fluid prescriber, % (N)</b>                                 | 1167 |                    | 960  |                    |         |
| <b>Registrar (mid-level)</b>                                   |      | 35.6 (415)         |      | 34.9 (335)         | <0.001  |
| <b>Specialist (Consultant/Attending)</b>                       |      | 24.9 (291)         |      | 34.5 (331)         |         |
| <b>Resident (Junior)</b>                                       |      | 34.9 (407)         |      | 26.1 (251)         |         |
| <b>Nurse</b>                                                   |      | 2.8 (33)           |      | 3 (29)             |         |
| <b>Other</b>                                                   |      | 1.8 (21)           |      | 1.5 (14)           |         |
