# Supplementary material for: Patterns of intravenous fluid resuscitation use in adult intensive care patients between 2007 and 2014: An international cross-sectional study
Source: PubMed Central journal article supplement (PMC5428917; doi:10.1371/journal.pone.0176292), 2017-05-12
Supplement: pone.0176292.s010.pdf [file pone.0176292.s010.pdf]

**S9 Table. Sensitivity analysis – multivariate analysis of factors associated with the use of crystalloid or colloid for the first fluid resuscitation episode in 2014**

| Characteristic                                            | OR (95% CI) for receiving crystalloid | p_value | OR (95% CI) for receiving colloid | p_value |
|-----------------------------------------------------------|---------------------------------------|---------|-----------------------------------|---------|
| <b>Study region</b>                                       |                                       | <0.001  |                                   | <0.001  |
| France                                                    | 1.00                                  |         | 1.00                              |         |
| Australia                                                 | 0.21 (0.06 to 0.73)                   |         | 2.44 (0.76 to 7.86)               |         |
| Brazil                                                    | 9.93 (3.22 to 30.63)                  |         | 0.16 (0.06 to 0.44)               |         |
| Canada                                                    | 0.59 (0.17 to 2.02)                   |         | 1.06 (0.34 to 3.28)               |         |
| China                                                     | 0.13 (0.04 to 0.41)                   |         | 9.91 (3.49 to 28.12)              |         |
| Denmark                                                   | 0.72 (0.17 to 3.02)                   |         | 0.70 (0.16 to 2.99)               |         |
| Germany                                                   | 5.25 (1.42 to 19.33)                  |         | 0.14 (0.04 to 0.50)               |         |
| New Zealand                                               | 0.36 (0.08 to 1.56)                   |         | 1.80 (0.44 to 7.33)               |         |
| Saudi Arabia                                              | 1.37 (0.22 to 8.55)                   |         | 0.69 (0.11 to 4.31)               |         |
| UK                                                        | 2.83 (0.37 to 21.72)                  |         | 0.19 (0.03 to 1.14)               |         |
| Other European countries                                  | 0.24 (0.06 to 0.97)                   |         | 1.91 (0.51 to 7.06)               |         |
| Other countries                                           | 0.59 (0.14 to 2.41)                   |         | 1.67 (0.51 to 5.47)               |         |
| Age (per one year increase)                               | 0.99 (0.98 to 1)                      | 0.077   | 1.01 (0.99 to 1.02)               | 0.234   |
| <b>Number of days in ICU at survey date</b>               |                                       |         |                                   |         |
| Number of days in ICU at survey date =0 day               | 1.00                                  |         | 1.00                              |         |
| Number of days in ICU at survey date >0 day               | 0.4 (0.24 to 0.66)                    | <0.001  | 2.07 (1.28 to 3.33)               | 0.003   |
| <b>Severity of illness in 24 hrs prior to survey date</b> |                                       |         |                                   |         |
| Low(< median)                                             | 1.00                                  | 0.053   | 1.00                              | 0.032   |
| High(>= median)                                           | 0.72 (0.43 to 1.19)                   |         | 1.24 (0.73 to 2.11)               |         |
| Missing                                                   | 1.77 (0.81 to 3.87)                   |         | 0.45 (0.21 to 1.01)               |         |
| <b>Trauma at hospital admission</b>                       |                                       |         |                                   |         |
| No Trauma                                                 | 1.00                                  | 0.116   | 1.00                              | 0.050   |
| Trauma without TBI                                        | 1.14 (0.53 to 2.44)                   |         | 0.73 (0.34 to 1.58)               |         |
| Trauma with TBI                                           | 2.59 (1.04 to 6.41)                   |         | 0.21 (0.06 to 0.73)               |         |
| <b>Sepsis in 24 hrs prior to survey date</b>              |                                       |         |                                   |         |
| No                                                        | 1.00                                  |         | 1.00                              |         |
| Yes                                                       | 0.94 (0.62 to 1.41)                   | 0.748   | 0.98 (0.67 to 1.42)               | 0.898   |
| <b>Chronic health point liver criteria</b>                |                                       |         |                                   |         |
| No                                                        | 1.00                                  |         | 1.00                              |         |
| Yes                                                       | 0.49 (0.21 to 1.16)                   | 0.106   | 1.62 (0.79 to 3.33)               | 0.186   |
| <b>Admission source</b>                                   |                                       |         |                                   |         |
| Operating room after elective surgery                     | 1.00                                  | 0.007   | 1.00                              | <0.001  |
| Emergency room                                            | 2.28 (1.12 to 4.61)                   |         | 0.41 (0.21 to 0.78)               |         |
| Hospital floor                                            | 1.31 (0.66 to 2.6)                    |         | 0.5 (0.26 to 0.97)                |         |
| Transferred from other ICU or hospital                    | 1.36 (0.65 to 2.84)                   |         | 0.72 (0.35 to 1.49)               |         |
| Operating room after emergency surgery                    | 1.14 (0.6 to 2.19)                    |         | 0.74 (0.4 to 1.37)                |         |
| Hospital floor after previous ICU stay                    | 0.58 (0.28 to 1.23)                   |         | 1.59 (0.8 to 3.18)                |         |

|                                                 |                     |       |                      |       |
|-------------------------------------------------|---------------------|-------|----------------------|-------|
| <b>Indication for fluid</b>                     |                     |       |                      |       |
| <b>Impaired perfusion or low cardiac output</b> | 1.00                | 0.068 | 1.00                 | 0.750 |
| <b>Ongoing bleeding</b>                         | 0.51 (0.14 to 1.83) |       | 1.48 (0.51 to 4.28)  |       |
| <b>Other fluid losses</b>                       | 0.97 (0.3 to 3.17)  |       | 1.10 (0.47 to 2.59)  |       |
| <b>Unit protocol</b>                            | 0.48 (0.21 to 1.07) |       | 1.63 (0.61 to 4.4)   |       |
| <b>Abnormal vital signs</b>                     | 0.65 (0.43 to 0.99) |       | 1.15 (0.8 to 1.64)   |       |
| <b>Indication for fluid, other</b>              | 0.21 (0.04 to 1.16) |       | 2.37 (0.52 to 10.86) |       |
| <b>Respiratory dysfunction</b>                  |                     |       |                      |       |
| <b>No (SOFA&lt;3)</b>                           | 1.00                |       | 1.00                 |       |
| <b>Yes (SOFA&gt;=3)</b>                         | 1.31 (0.8 to 2.14)  | 0.286 | 1.01 (0.66 to 1.55)  | 0.953 |
| <b>Renal replacement therapy</b>                |                     |       |                      |       |
| <b>No</b>                                       | 1.00                |       | 1.00                 |       |
| <b>Yes</b>                                      | 0.41 (0.22 to 0.79) | 0.007 | 2.41 (1.13 to 5.12)  | 0.023 |
| <b>Mechanical ventilation</b>                   |                     |       |                      |       |
| <b>No</b>                                       | 1.00                |       | 1.00                 |       |
| <b>Yes</b>                                      | 0.74 (0.46 to 1.2)  | 0.222 | 1.38 (0.87 to 2.19)  | 0.169 |
| <b>Low filling pressure</b>                     |                     |       |                      |       |
| <b>No</b>                                       | 1.00                | 0.232 | 1.00                 | 0.464 |
| <b>Yes</b>                                      | 1.52 (0.4 to 5.77)  |       | 1.33 (0.47 to 3.74)  |       |
| <b>missing</b>                                  | 1.45 (0.93 to 2.26) |       | 0.81 (0.53 to 1.22)  |       |
| <b>Bilirubin</b>                                |                     |       |                      |       |
| <b>&lt;20 umol/L</b>                            | 1.00                | 0.513 | 1.00                 | 0.503 |
| <b>&gt;=20 umol/L</b>                           | 0.75 (0.46 to 1.22) |       | 1.32 (0.82 to 2.11)  |       |
| <b>missing</b>                                  | 0.85 (0.4 to 1.77)  |       | 1.06 (0.54 to 2.09)  |       |
| <b>Albumin</b>                                  |                     |       |                      |       |
| <b>&lt;27 g/L</b>                               | 1.00                | 0.717 | 1.00                 | 0.181 |
| <b>&gt;=27 g/L</b>                              | 0.88 (0.55 to 1.4)  |       | 0.88 (0.6 to 1.3)    |       |
| <b>missing</b>                                  | 1.14 (0.58 to 2.22) |       | 0.57 (0.31 to 1.03)  |       |
| <b>Fluid output</b>                             |                     |       |                      |       |
| <b>&lt;1 ml/kg/hr</b>                           | 1.00                | 0.153 | 1.00                 | 0.024 |
| <b>&gt;=1 ml/kg/hr</b>                          | 0.6 (0.35 to 1.03)  |       | 1.83 (1.09 to 3.07)  |       |
| <b>missing</b>                                  | 0.79 (0.38 to 1.64) |       | 1.16 (0.59 to 2.29)  |       |

Results are generated from a generalised estimating equation model with site/ICU ID as a cluster. When the P-values of the individual variable odds ratios (not presented) were <0.01 the odds ratios displayed in table are highlighted. The P-values displayed in the table are type III P-values. Analysis include 1,174 first fluid episodes from 1,174 study participants as data were lost due to missing values which could not be included in the multivariate analysis. This number represents a loss of 19.4% of first fluid episodes/study participants.
